# Supplementary material
Source: Springer Nature journal article supplement (https://www.springermedizin.de/resource/supplementary/12891_2010_972_MOESM1_ESM.pdf/9506826)
Supplement: MOESM1 [file 9506826]

456 patients with hip fractures in 2004/2005  
(mean age =  $81 \pm 9$  years, 71% females)

137 excluded (mean age =  $84 \pm 8$  years, 70% females)  
12 unwilling (mean age =  $82 \pm 6$  years, 75% females)

307 patients at the osteoporosis centre  
(mean age =  $80 \pm 9$  years, 72% females)

134 excluded (mean age =  $84 \pm 8$  years, 68% females)  
76 unwilling (mean age =  $81 \pm 8$  years, 76% females)

97 patients included in the study  
(mean age =  $75 \pm 10$  years, 73% females)

5 died  
20 dropped out

72 patients at one-year  
follow-up

5 died  
6 dropped out

61 hip patients at two-year  
follow-up
